# Supplementary material
Source: PubMed Central journal article supplement (PMC5705045)
Supplement: NIHMS920593-supplement-supplement_1.pdf [file NIHMS920593-supplement-supplement_1.pdf]

Supplementary Materials for  
**Intravascular pressure enhances the abundance of functional  $K_v1.5$   
channels at the surface of arterial smooth muscle cells**

Michael W. Kidd, M. Dennis Leo, John P. Bannister, Jonathan H. Jaggar\*

\*Corresponding author. E-mail: [jjaggar@uthsc.edu](mailto:jjaggar@uthsc.edu)

Published 18 August 2015, *Sci. Signal.* **8**, ra83 (2015)  
DOI: 10.1126/scisignal.aac5128

**The PDF file includes:**

Fig. S1. The transcripts for multiple  $K_v$  channel isoforms are expressed in pure mesenteric artery myocytes.

Fig. S2.  $K_v1.5$  and  $K_v2.1$  antibodies are specific and detect the proteins in arterial lysates.

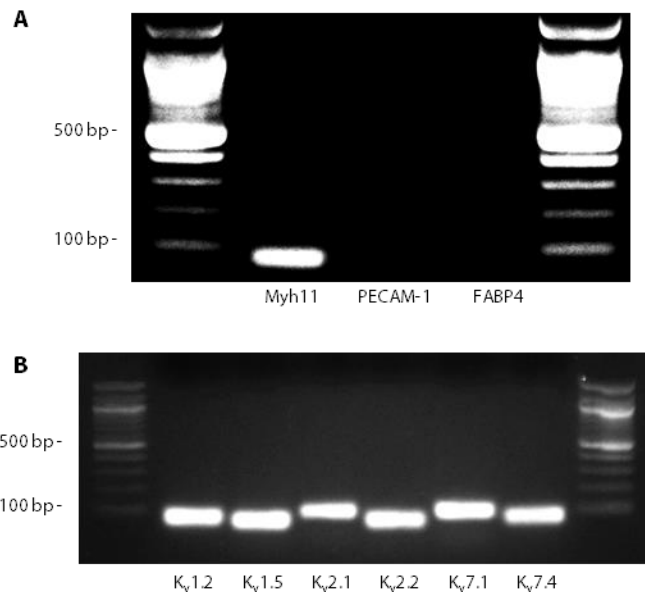

**Fig. S1. The transcripts for multiple K<sub>v</sub> channel isoforms are expressed in pure mesenteric artery myocytes.** (A) Agarose gel of PCR products demonstrating myocyte purity. PCR amplified transcripts for myosin heavy chain 11 (Myh11), but not endothelial cell (platelet-endothelial cell adhesion molecule-1 [PECAM-1]) or adipocyte (fatty acid binding protein 4 [FABP4]) markers in the same cDNA. (B) Agarose gel image of PCR products showing that each K<sub>v</sub> isoform primer set used for quantitative PCR produces a single band of predicted size and indicating the presence of transcripts for each of the seven K<sub>v</sub> channel members in pure myocytes.

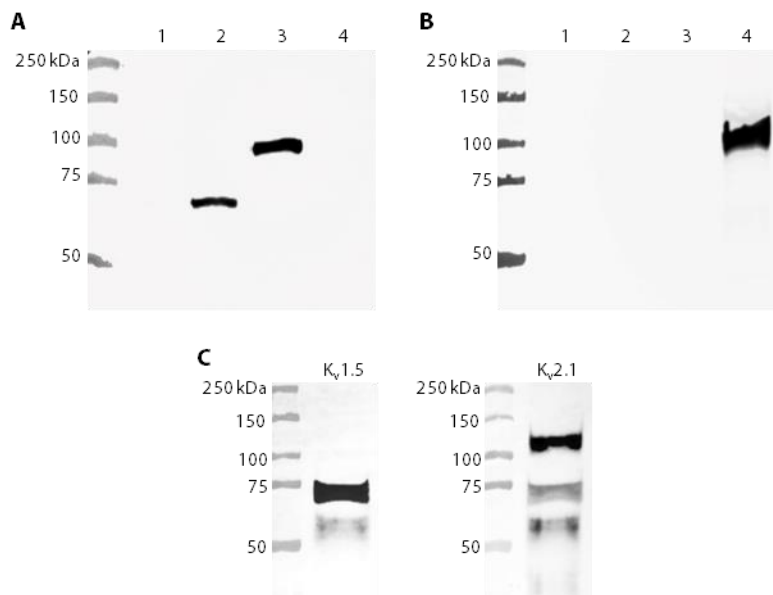

**Fig. S2. K<sub>v</sub>1.5 and K<sub>v</sub>2.1 antibodies are specific and detect the proteins in arterial lysates.** (A) Western blot probed with the K<sub>v</sub>1.5 antibody of lysates from HEK293 cells mock transfected (lane 1) or transfected with vectors that encode K<sub>v</sub>1.5 (lane 2), green fluorescent protein (GFP)-tagged K<sub>v</sub>1.5 (lane 3), or K<sub>v</sub>2.1 (lane 4). (B) Western blot of the same samples described in panel A probed with the K<sub>v</sub>2.1 antibody. (C) Western blot of arterial lysate probed with the K<sub>v</sub>1.5- or K<sub>v</sub>2.1-specific antibodies.
